# Supplementary material
Source: publisher figshare collection journal article supplement (https://acs.figshare.com/ndownloader/files/15077516)
Supplement: Supplementary file 1 [file 15077516]

## **Supporting Information**

### **3D Branched Crystal Carbon Nitride with Enhanced Intrinsic Peroxidase-Like Activity: a Hypersensitive Platform for Colorimetric Detection**

Yaofang Fan, Weican Zhang, Yanming Liu, Zhenxing Zeng, Xie Quan, Huimin Zhao\*

Key Laboratory of Industrial Ecology and Environmental Engineering (Ministry of Education, China), School of Environmental Science and Technology, Dalian University of Technology, Dalian 116024, China;  
[zhaohuim@dlut.edu.cn](mailto:zhaohuim@dlut.edu.cn)

## EXPERIMENTAL SECTION

### Materials

All reagents (Melamine, LiCl, KCl, CH<sub>3</sub>COONa, CH<sub>3</sub>COOH, H<sub>2</sub>O<sub>2</sub>, TMB, ABTS, MgCl<sub>2</sub>, KCl) used were analytic degree in this paper without any purification in use. DNA oligomers were purchased from Sangon Biotech (Shanghai, China). Ultrapure water was obtained through a Millipore water purification system (Laikie Instrument Co., Ltd., Shanghai, China).

### Instruments

Scanning electron microscopy (SEM) images were obtained through field emission SEM (Hitachi S4800). Transmission electron microscopy (TEM) images and energy-dispersive X-ray spectroscopy (EDS) elemental mapping were gained from high-magnification TEM (FEI Tecnai G2 F30 S-Twin). X-ray diffraction (XRD, D8 ADVANCE Powder) equipped with a Cu-K $\alpha$  radiation was used for crystal phase structures of all the as-prepared samples. The chemical structures of as-prepared samples were obtained through Fourier Transform Infrared (FTIR, Bruker VERTEX 70 FTIR). Jasco V-550 spectrometer was employed for ultraviolet-visible (UV-vis) absorption spectra. Electron paramagnetic resonance (EPR, Bruker 300E spectrometer, Germany) was employed for  $\cdot$ OH detection. The water contact angle (WCA) was determined by an optical contact angle and interface tension meter (KINO SL 200KB).

### 3DBC-C<sub>3</sub>N<sub>4</sub> preparation

10 g of melamine was placed in a crucible with a cover and heated to 550 °C for 4 h with a heating rate of 12 °C/min, and then yellow power g-C<sub>3</sub>N<sub>4</sub> obtained after natural cooling to room temperature. A mixture of 1 g of obtained yellow power and the 6 g of KCl/LiCl 11:9 (weight/weight) was heated to 550 °C for 4 h under Ar with a heating rate of 12 °C/min. When the temperature of the mixtures was cooled down to room temperature by natural cooling, the as-prepared mixture was suddenly washed by ice water and dried at 60 °C for 12 h. The 3DBC-C<sub>3</sub>N<sub>4</sub> with nanoneedles was fabricated.

### Peroxidase-like activity assays

0.1 mg/mL as-prepared nanomaterials were mixed with 5 mM TMB and 50 mM H<sub>2</sub>O<sub>2</sub> at acetate buffer (pH = 4) for 30 min in room temperature. For analyzing ssDNA on the

peroxidase-like properties of 3DBC-C<sub>3</sub>N<sub>4</sub>, the mixture of 3  $\mu$ M ssDNA (A<sub>22</sub>, T<sub>22</sub>, C<sub>22</sub>, G<sub>22</sub>) or different cytosine length (C<sub>5</sub>, C<sub>10</sub>, C<sub>22</sub>, C<sub>44</sub>, C<sub>80</sub>) in buffer and 0.1 mg/mL 3DBC-C<sub>3</sub>N<sub>4</sub> in acetate buffer (pH = 4) was incubated at room temperature for 1 h, followed by the substrate 5 mM TMB and 50 mM H<sub>2</sub>O<sub>2</sub> addition, sequence shown in Table S1. ssDNA attaching 3DBC-C<sub>3</sub>N<sub>4</sub> in different concentration of saline ion was maintained at room temperature for 1 h, followed by the substrate 5 mM TMB (5 mM ABTS) addition. After being incubated for 30 min at room temperature, the absorbance of these solutions in a cell was measured with 652 nm excitation.

### **Steady-State Kinetic Analysis**

Kinetic experiments were carried out in a 1.5 mL EP tube containing 0.1 mg/mL pre-prepared nanomaterials in acetate buffer (pH = 4) with varied concentrations of TMB (H<sub>2</sub>O<sub>2</sub>) and 50 mM H<sub>2</sub>O<sub>2</sub> (5 mM TMB). A Line-Burk plot was provided for Michaelis-Menten constant calculated:  $V_0 = (V_{\max} + [S]) / (K_m + [S])$ , where  $V_0$  is the initial velocity,  $V_{\max}$  is the maximal reaction velocity,  $[S]$  correspond to the substrate concentration, and  $K_m$  is the Michaelis-Menten constant, equaling to  $[S]$  when the reaction velocity reached half of  $V_{\max}$ .

### **EPR and Zeta**

EPR was carried out for  $\cdot$ OH detection. After nanomaterials with or without ssDNA and H<sub>2</sub>O<sub>2</sub> mixed for 30 min at room temperature. The 5, 5-Dimethyl-1-pyrroline-*N*-oxide (DMPO) was added into the mixture as the spin trapping agent for  $\cdot$ OH detection. Zeta potential measurement was also investigated for different treatments of surface charge effect at acetate buffer (pH = 4).

### **OTC detection**

OTC aptamer and 3DBC-C<sub>3</sub>N<sub>4</sub> were incubated room temperature for 30 min, aptamer sequence listed in Table S1. Then different concentrations of OTC were added for hybridizing with its aptamer in room temperature for 1 h. The mixture was mixed with 5 mM TMB and 50 mM H<sub>2</sub>O<sub>2</sub> at room temperature for 30 min. The absorbance of the cell with solution was measured at 652 nm.

### **Cell viability assay and bioimaging analyze**

Liver hepatocellular carcinoma (HepG<sub>2</sub>) cells were cultured in Dulbecco's modified

Eagle's medium (DMEM) in a Petri dish, containing 10% fetal bovine serum. The Petri dish was incubated in a humidified atmosphere containing 5% CO<sub>2</sub> at 37 °C. HepG<sub>2</sub> cells were dispersed in a 96 well microtiter plate at  $1.0 \times 10^5$  cells per well. Different concentrations of 3DBC-C<sub>3</sub>N<sub>4</sub> were added into HepG<sub>2</sub> cells and then incubated for 24 h. Subsequently, the cells were washed five times with 0.1 mM PBS buffer and 100  $\mu$ L of 5 mg/mL. Methyl thiazolyl tetrazolium (MTT) in PBS buffer was added to each well for 5 h. After MTT solution discarded, 200  $\mu$ L of DMSO was added to solubilize the formazan crystals, and then the solution in each well was collected. The absorbance was measured at 490 nm by a RT 6000 microplate reader. The 3DBC-C<sub>3</sub>N<sub>4</sub> was incubated in Hela cells for 24 h. After PBS washing, fluorescence was detected via laser scanning confocal microscopy (Leica, Wetzlar, German).

## RESULTS

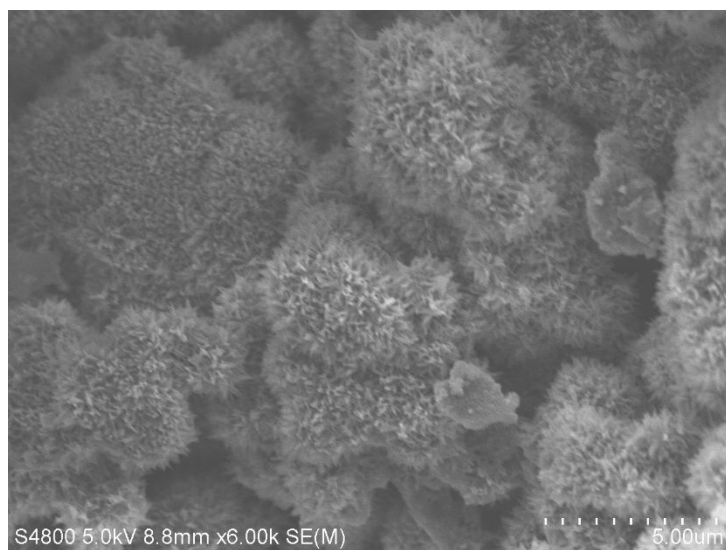

Figure S1. Low magnification SEM images of 3DBC-C<sub>3</sub>N<sub>4</sub>.

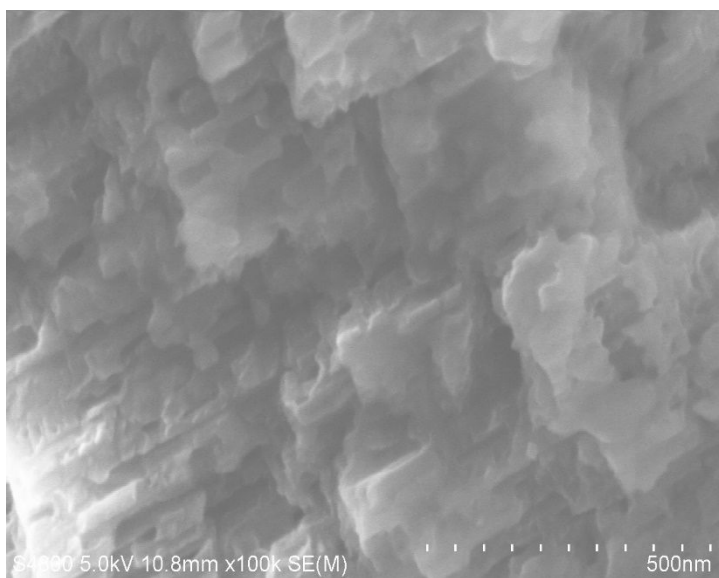

Figure S2. Low magnification SEM images of g-C<sub>3</sub>N<sub>4</sub>.

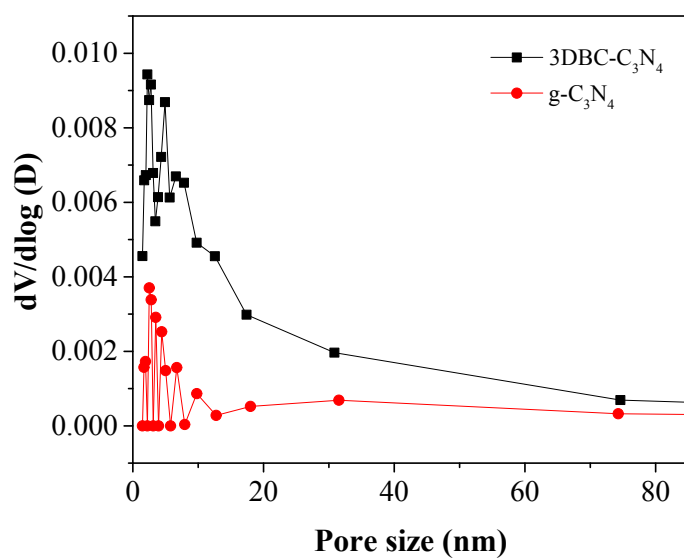

Figure S3. Pore-size distribution curves of 3DBC-C<sub>3</sub>N<sub>4</sub> and g-C<sub>3</sub>N<sub>4</sub>

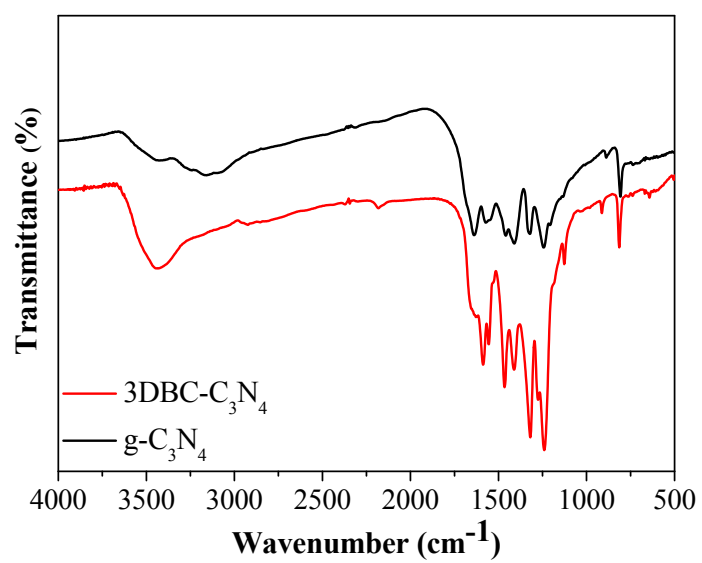

Figure S4. FT-IR of 3DBC-C<sub>3</sub>N<sub>4</sub> and g-C<sub>3</sub>N<sub>4</sub>.

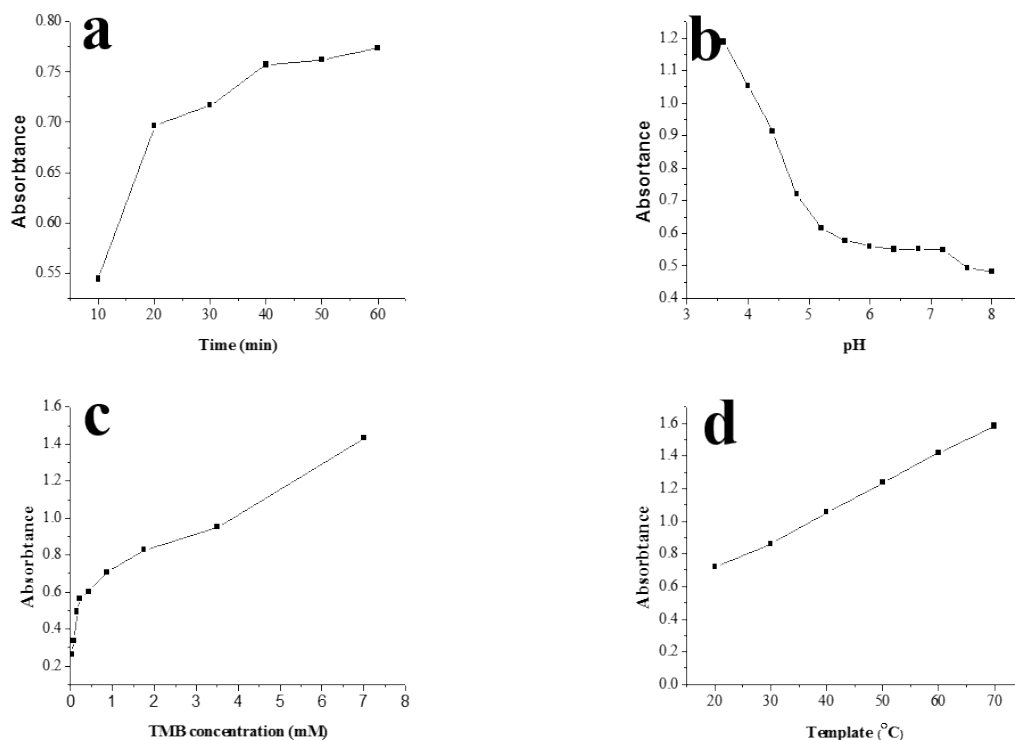

Figure S5. The effect of incubated time (a), pH (b), concentration of TMB (c) and temperature (d) on peroxidase-like of 3DBC-C<sub>3</sub>N<sub>4</sub>.

Table S1. Sequence of nucleic oligomers used in this paper

| Nucleotide  | Sequence (5'-3')                                                                 |
|-------------|----------------------------------------------------------------------------------|
| A22         | AAAAAAAAAAAAAAAAAAAAAAAAA                                                        |
| T22         | TTTTTTTTTTTTTTTTTTTTTTTTT                                                        |
| C22         | CCCCCCCCCCCCCCCCCCCCCCCCC                                                        |
| G22         | GGGGGGGGGGGGGGGGGGGGGGGGG                                                        |
| OTC aptamer | CGTACGGAATTCGCTAGCCGAGTTGAGCCGGGCGCGGTA<br>CGGGTACTGGTATGTGTGGGGATCCGAGCTCCACGTG |

Table S2. Comparison of available sensors for OTC detection

| Method                                                           | Analytical method | Ranges                  | LODs    | Reference    |
|------------------------------------------------------------------|-------------------|-------------------------|---------|--------------|
| Light scattering agglutination assay based on aptamer-conjugated | Photon count      | 100-10 <sup>4</sup> ppb | 100 ppb | <sup>1</sup> |

---

polystyrene latex micropheres

|                                                                                        |                        |                               |                           |              |
|----------------------------------------------------------------------------------------|------------------------|-------------------------------|---------------------------|--------------|
| A microfabricated cantilever array                                                     | Differential           | 1.0-100 nM                    | 0.2 nM                    | <sup>2</sup> |
| based on aptamerself-assembled monolayer sensor                                        | deflection             |                               |                           |              |
| Using electrochemiluminescence (ECL) based on (RuSiNPs)/Nafion film modified electrode | ECL intensity          | 0.1-100 $\mu\text{M L}^{-1}$  | 0.1 $\mu\text{M L}^{-1}$  | <sup>3</sup> |
| A colorimetric assay based on gold nanoparticles                                       | UV-Vis absorbance      | 0.42-16 $\mu\text{g mL}^{-1}$ | 0.17 $\mu\text{gmL}^{-1}$ | <sup>4</sup> |
| Using one-pot carbon nanoparticles sensors                                             | Fluorescence intensity | 0.06-6 $\mu\text{M}$          | 6.9 nM                    | <sup>5</sup> |
| Using a fluorescein-labeled long-chain aptamer assembled onto reduced graphene oxide   | Fluorescence intensity | 0.1-2 $\mu\text{M}$           | 10 nM                     | <sup>6</sup> |
| Based on 3D graphene supported bimetallic nanocomposites with aptamer                  | UV-Vis absorbance      | 0.01-0.25 $\mu\text{M}$       | 8nM                       | <sup>7</sup> |

---

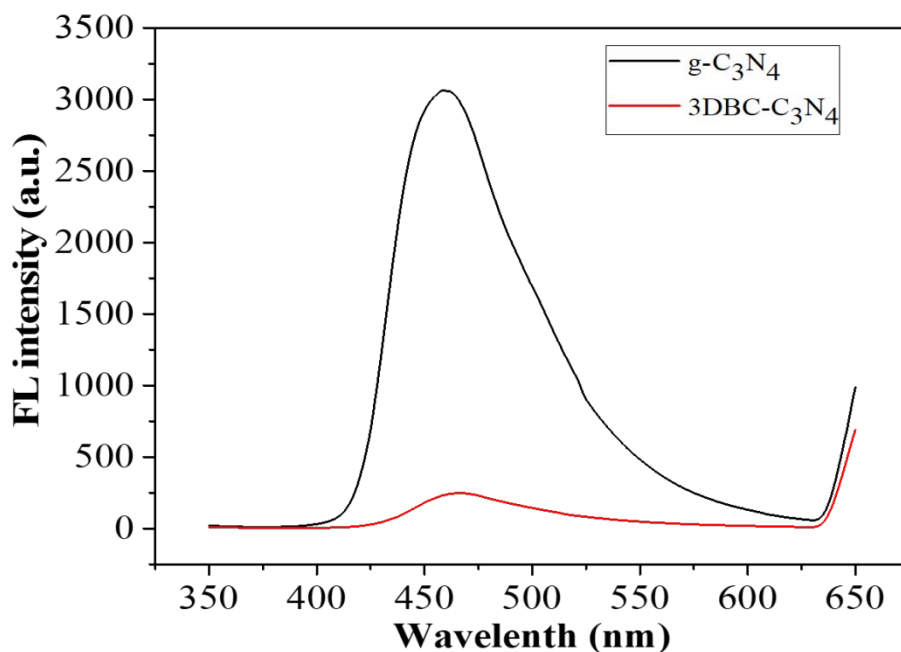

Figure S6. Fluorescence spectra of 3DBC-C<sub>3</sub>N<sub>4</sub> and g-C<sub>3</sub>N<sub>4</sub>.

## REFERENCES

## REFERENCES

- (1) Kim, K.; Gu, M. B.; Kang, D. H.; Park, J. W.; Song, I. H.; Jung, H. S.; Suh, K. Y. High-Sensitivity Detection of Oxytetracycline Using Light Scattering Agglutination Assay with Aptasensor. *Electrophoresis* **2010**, *31* (18), 3115-3120.
- (2) Hou, H.; Bai, X.; Xing, C.; Gu, N.; Zhang, B.; Tang, J. Aptamer-Based Cantilever Array Sensors for Oxytetracycline Detection. *Anal. Chem.* **2013**, *85* (4), 2010-2014.
- (3) Zhao, Y.; Ye, C.; Liu, W.; Chen, R.; Jiang, X. Tuning the Composition of AuPt Bimetallic Nanoparticles for Antibacterial Application. *Angew. Chem., Int. Ed.* **2014**, *53* (31), 8127-8131.
- (4) Shen, L.; Chen, J.; Li, N.; He, P.; Li, Z. Rapid Colorimetric Sensing of Tetracycline Antibiotics with In Situ Growth of Gold Nanoparticles. *Anal. Chim. Acta* **2014**, *839*, 83-90.
- (5) Yang, X.; Luo, Y.; Zhu, S.; Feng, Y.; Zhuo, Y.; Dou, Y. One-Pot Synthesis of High Fluorescent Carbon Nanoparticles and Their Applications as Probes for Detection of Tetracyclines. *Biosens. Bioelectron.* **2014**, *56*, 6-11.
- (6) Zhao, H.; Gao, S.; Liu, M.; Chang, Y.; Fan, X.; Quan, X. Fluorescent Assay for Oxytetracycline Based on a Long-Chain Aptamer Assembled onto Reduced Graphene Oxide. *Microchim. Acta* **2013**, *180* (9-10), 829-835.
- (7) Yuan, F.; Zhao, H.; Zang, H.; Ye, F.; Quan, X. Three-Dimensional Graphene Supported Bimetallic Nanocomposites with DNA Regulated-Flexibly Switchable Peroxidase-Like Activity. *ACS Appl. Mater. Interfaces* **2016**, *8* (15), 9855-9864.
